# Supplementary material for: Angiogenesis and tissue formation driven by an arteriovenous loop in the mouse
Source: PubMed Central journal article supplement (PMC6642172; doi:10.1038/s41598-019-46571-4), 2019-07-19
Supplement: 41598_2019_46571_MOESM1_ESM.pdf [file 41598_2019_46571_MOESM1_ESM.pdf]

# Angiogenesis and tissue formation driven by an arteriovenous loop in the mouse

Richard Wong<sup>1</sup>, Roberto Donno<sup>2\*</sup>, Christopher Y. Leon-Valdivieso<sup>3</sup>, Urmas Roostalu<sup>1,4</sup>, Brian Derby<sup>3</sup>, Nicola Tirelli<sup>2,5</sup>, Jason K. Wong<sup>1,6\*</sup>

- <sup>1.</sup> Division of Cell Matrix and Regenerative Medicine, Faculty of Biology, Medicine and Health. Manchester Academic Health Science Centre. University of Manchester, Manchester, M13 9PT, UK.
- <sup>2.</sup> Laboratory of Polymers and Biomaterials, Fondazione Istituto Italiano di Tecnologia, Via Morego, 30 16163 Genova, Italy
- <sup>3.</sup> School of Materials, University of Manchester, Manchester, M13 9PL, UK. *Current address:* Roberval Laboratory for Mechanics, Sorbonne Universités, Université de Technologie de Compiègne, Rue du Dr. Schweitzer, 60200 Compiègne, France.
- <sup>4.</sup> Gubra, Horsholm, Denmark.
- <sup>5.</sup> Division of Pharmacy & Optometry, School of Health Science, University of Manchester, Manchester M13 9PT, United Kingdom
- <sup>6.</sup> Department of Burns and Plastic Surgery, Manchester University Foundation Trust, Manchester Academic Health Science Centre, Wythenshawe Hospital, Southmoor Road, Manchester, M23 9LT, UK.

\* Author correspondence:

Jason K. Wong (Senior Corresponding Author)

3.106 Stopford Building, Faculty of Biology, Medicine and Health, University of Manchester, Manchester, M13 9PT, UK

Tel +44 16127 51592

[jason.k.wong@manchester.ac.uk](mailto:jason.k.wong@manchester.ac.uk)

Roberto Donno (Co-Corresponding Author)

Laboratory of Polymers and Biomaterials, Fondazione Istituto Italiano di Tecnologia, Via Morego 30, 16163 Genoa, Italy

Tel +39 010 71781 761

[roberto.donno@iit.it](mailto:roberto.donno@iit.it)

## Supplementary Information

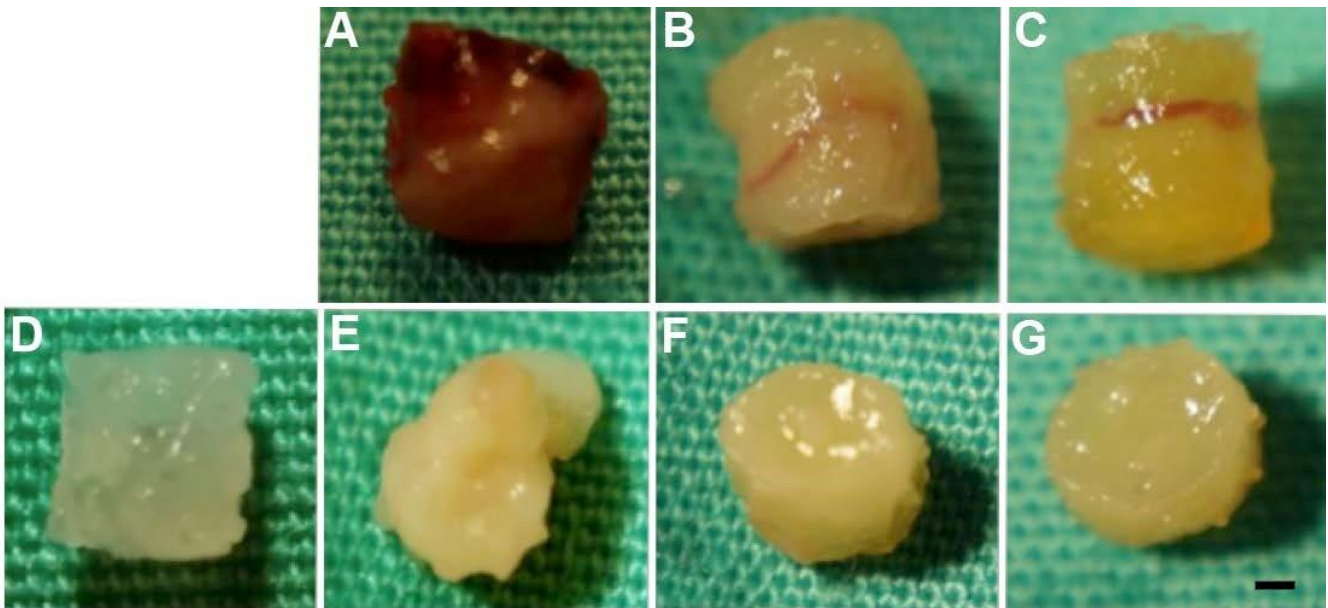

**Figure S1:** Appearance of the contents of chamber with AVL at (A) day 4, (B) day 21 and (C) day 28; and no AVL controls at (D) day 0, (E) day 4, (F) day 21 and (G) day 28. Scale bar = 1mm

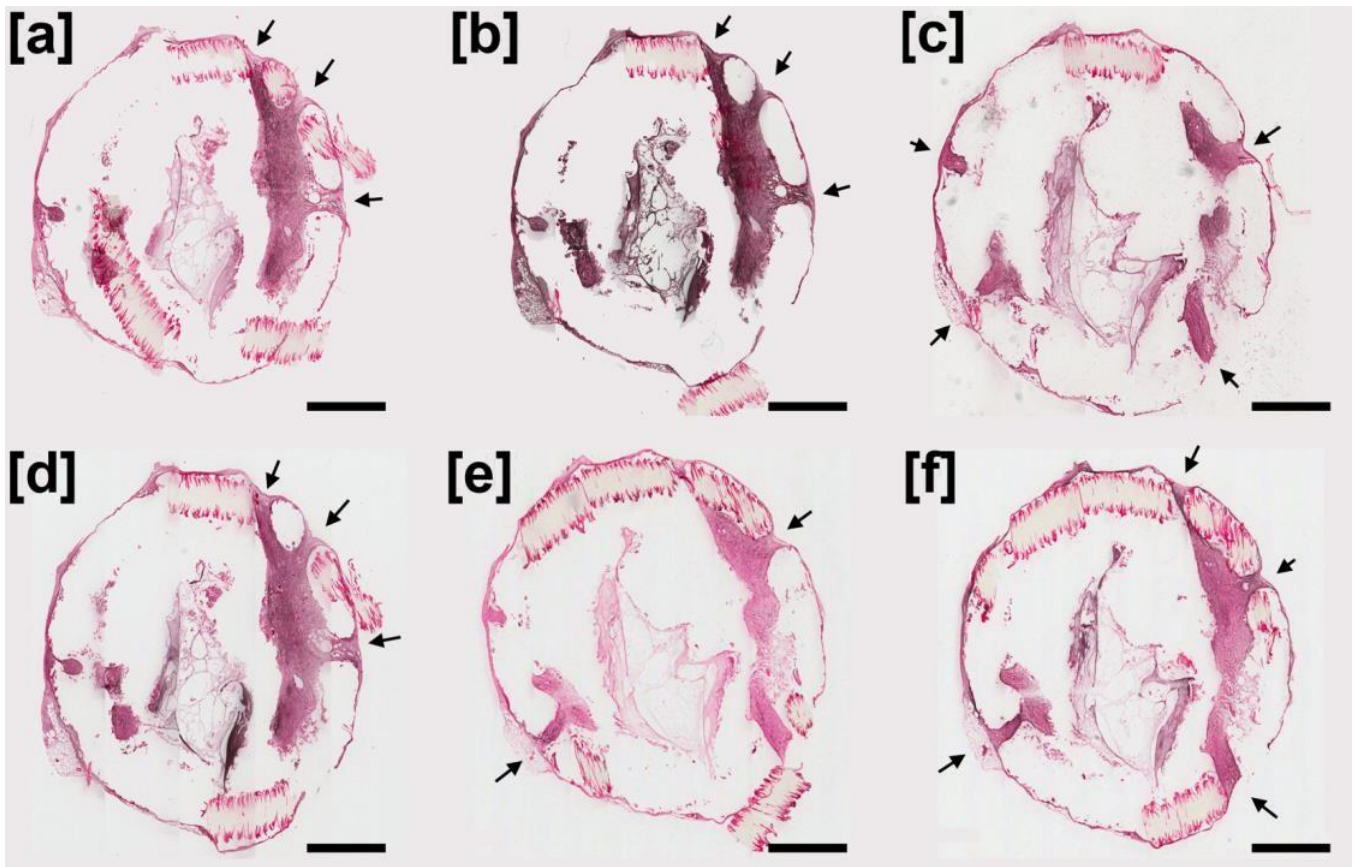

**Figure S2:** Immuno-staining of control chambers with no AVL at 28 days show that there is little blood vessel or tissue formation with ingress occurring via the pores (arrows). Scale bar = 1mm. (a) CD31 (b) laminin (c)  $\alpha$ -SMA (d) VEGF (e) BrdU (f) Hsp47.

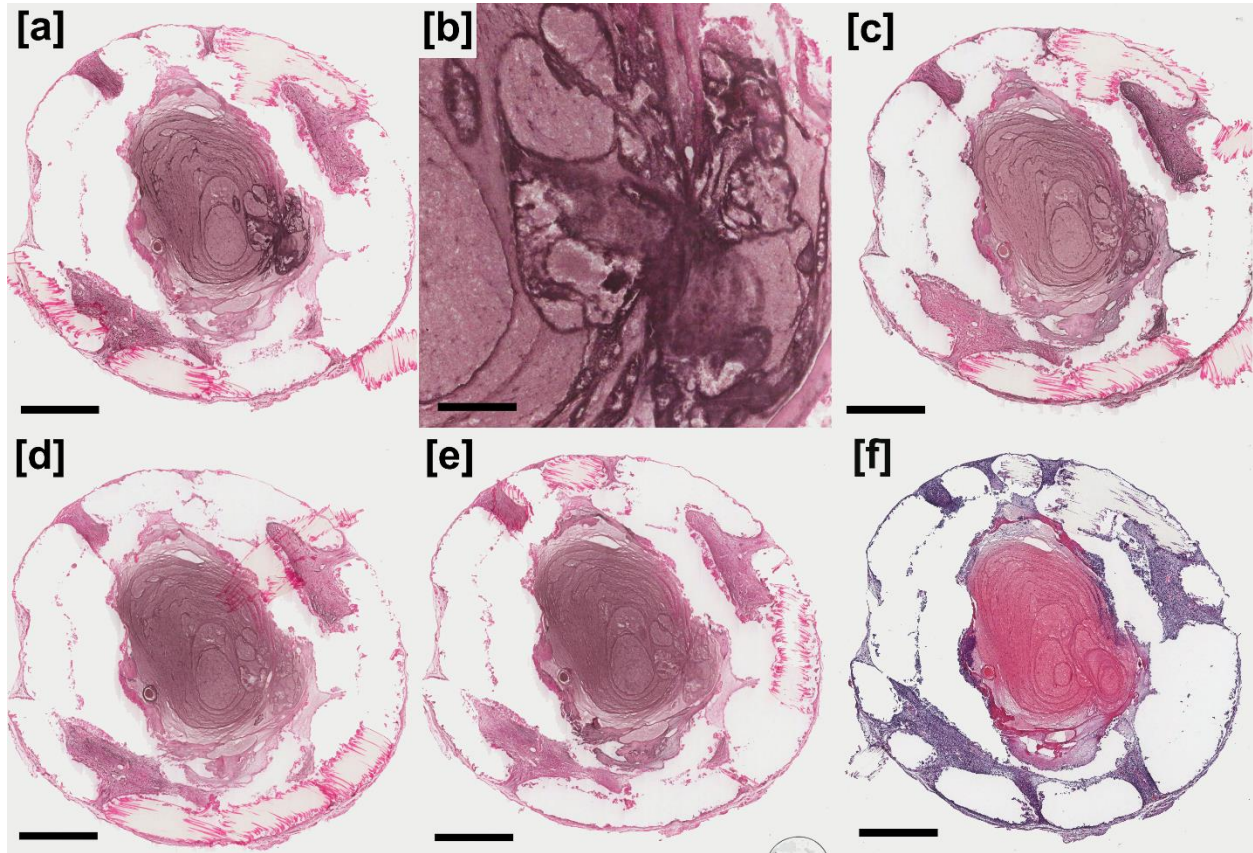

**Figure S3:** Immuno-staining and histology of no-flow AVL control chambers at 28 days show that there is little blood vessel or tissue formation around the ligated vessel. The vessel provides a potential source of blood and may have resulted in a haematoma appearance within the fibrin matrix. The staining and structure is different to that of the AVL samples (Figure S5). Scale bar = 1mm except (b) which is 200  $\mu$ m. (a) CD31 (b) CD31 with higher magnification (c) laminin (d)  $\alpha$ -SMA (e) VEGF (f) H&E stain.

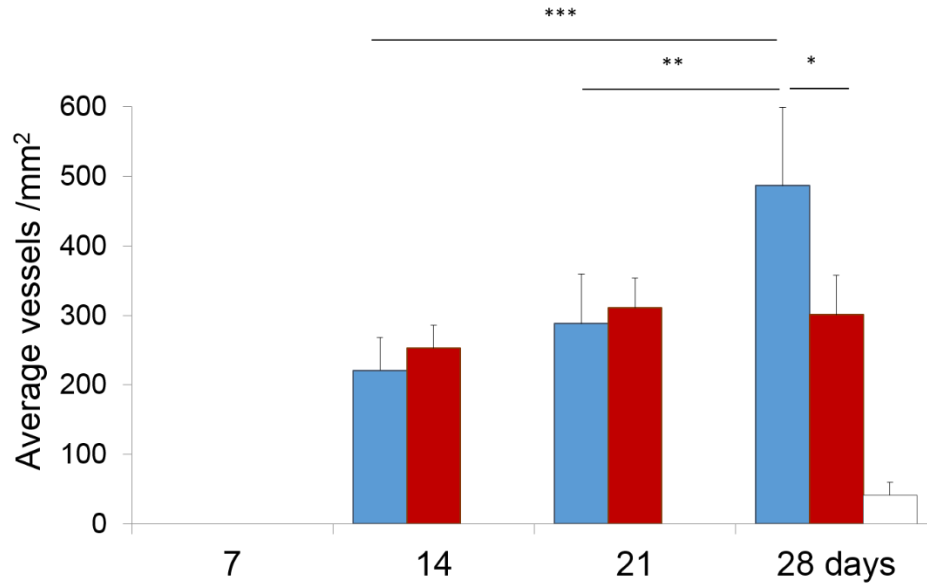

**Figure S4:** The graph shows the average number of blood vessels counted in 4 central sections of chambers (N=3) stained by CD31. Counts were differentiated between the venous side (blue) and the arterial side (red) of the AVL. White = no AVL control. Vessels counted show that there was a significant increase in vessels from day 14 onwards in AVL chambers. A greater number of vessels were also found from the vein side of the AVL than the arterial side on day 28. Student T-test comparisons \*\*\* P<0.0001, \*\* P<0.001, \* P<0.05.

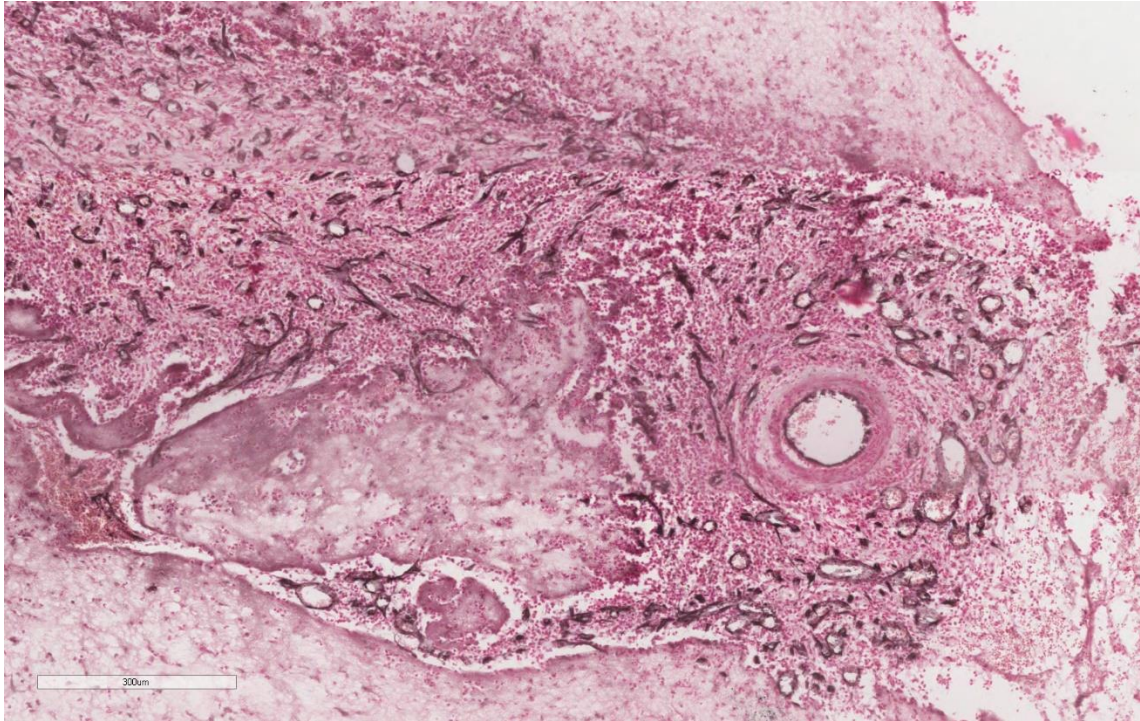

**Figure S5(a)** Cross-section of AVL at 14 days with CD31 staining. Vessels can be observed around the artery. Scale bar = 300 μm

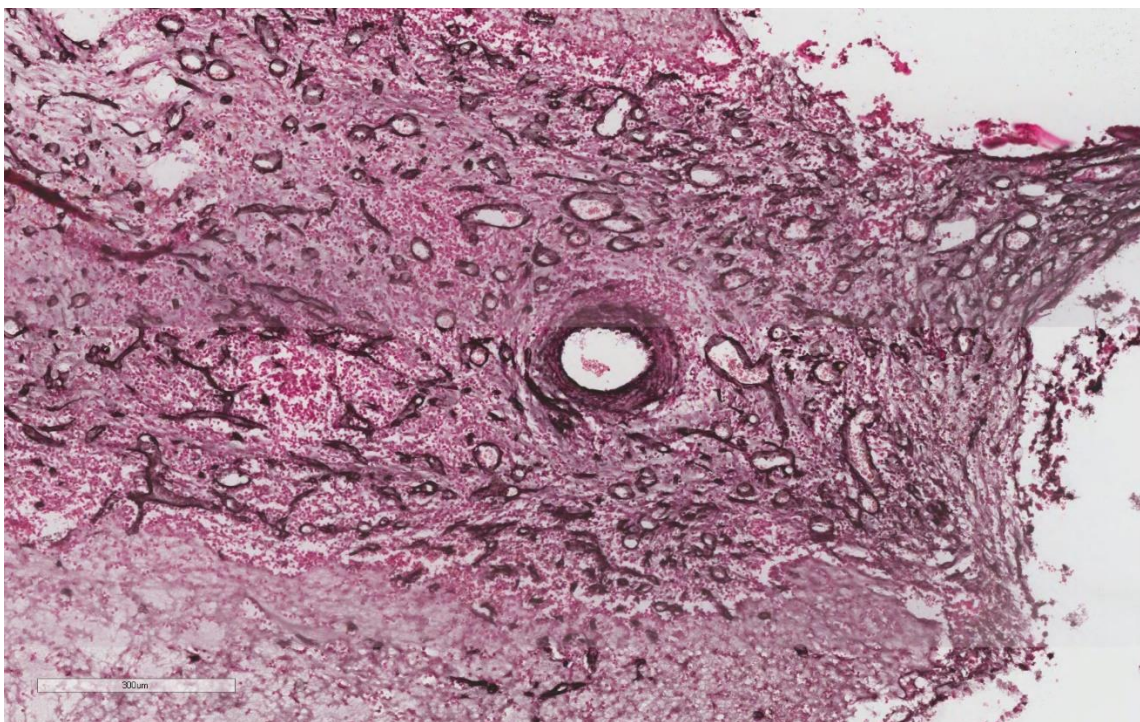

**Figure S5(b)** Cross-section of AVL at 14 days with laminin staining. A number of vessels can be observed around the artery. Scale bar = 300 μm

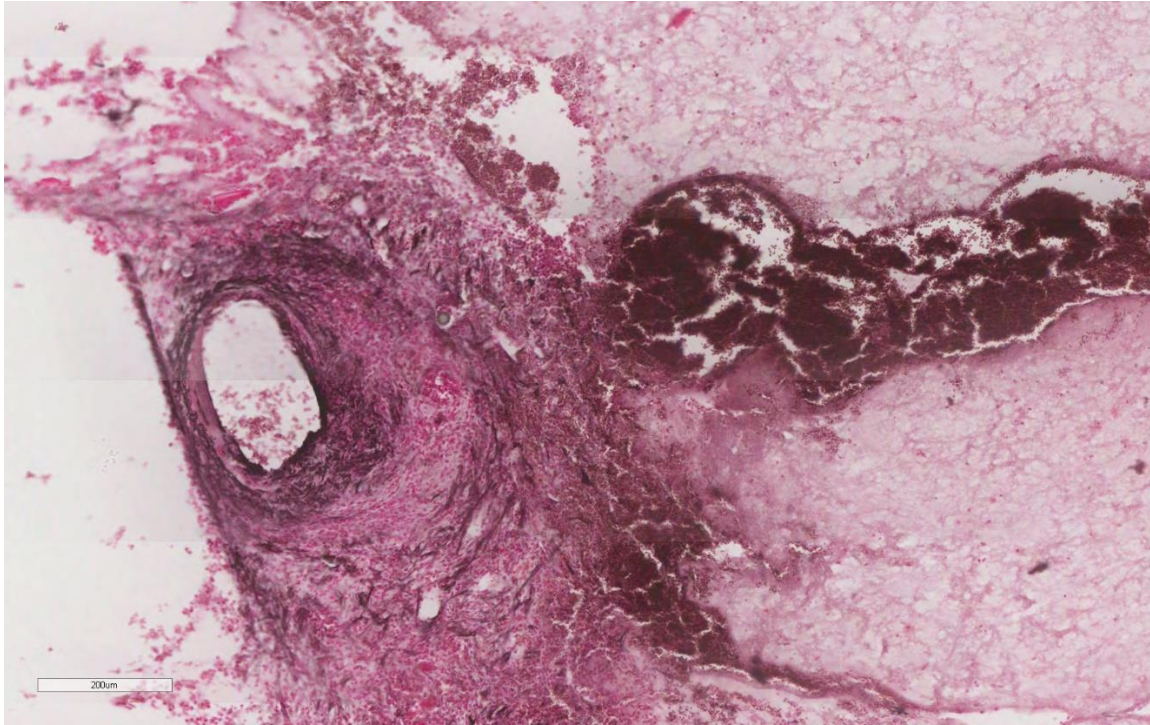

**Figure S5(c)** Cross-section of AVL at 14 days with  $\alpha$ -SMA staining. The vein is visible on the left with the vessel looping from the artery (off-screen). Scale bar = 200  $\mu$ m

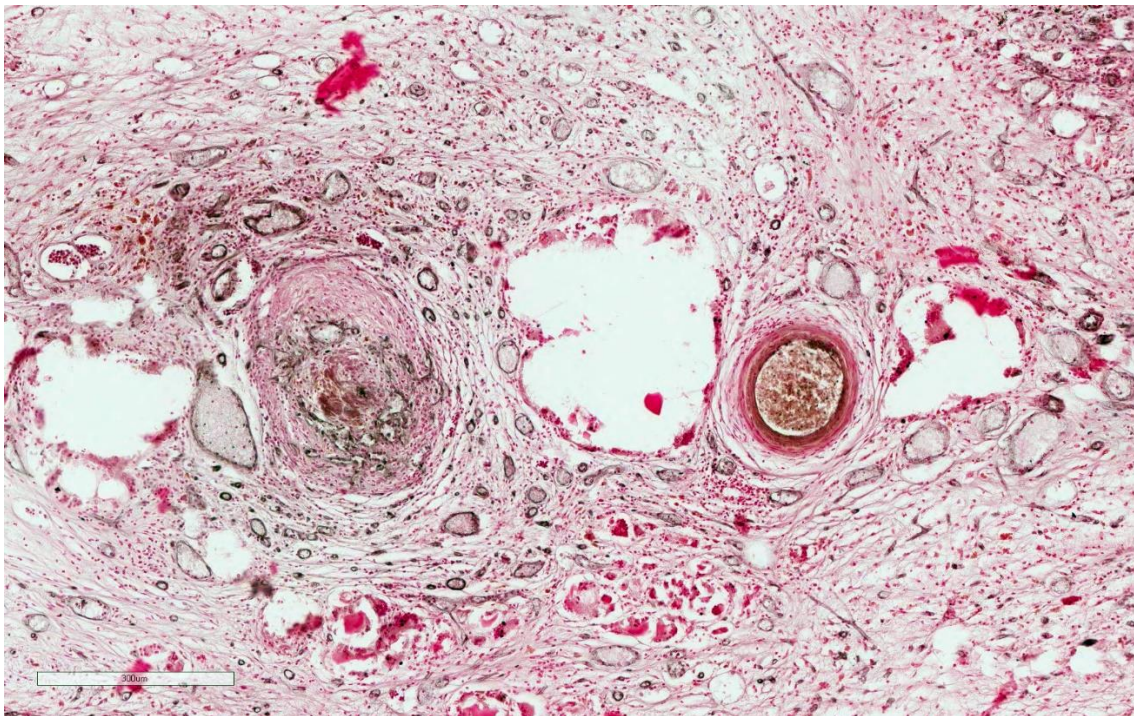

**Figure S5(d)** Cross-section of AVL at 28 days with CD31 staining. A greater number of vessels can be observed around the vein (left) than the artery (right). Scale bar = 300  $\mu$ m

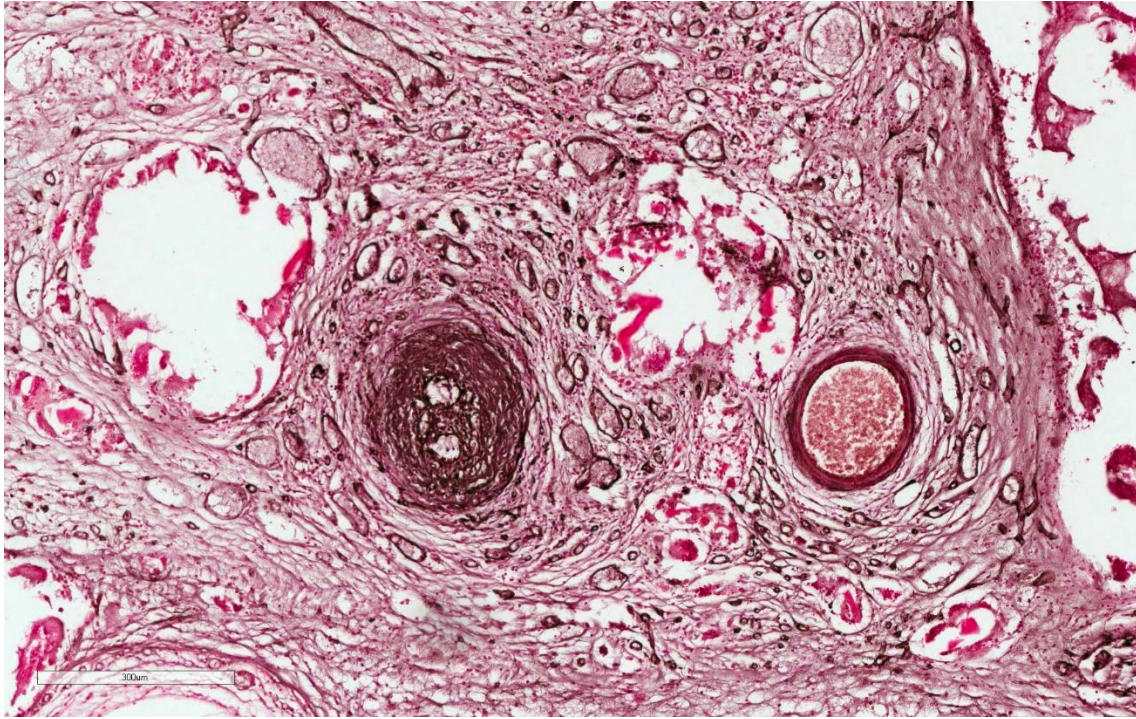

**Figure S5(e)** Cross-section of AVL at 28 days with laminin staining. A greater number of vessels can be observed around the vein (left) than the artery (right). Scale bar = 300 μm

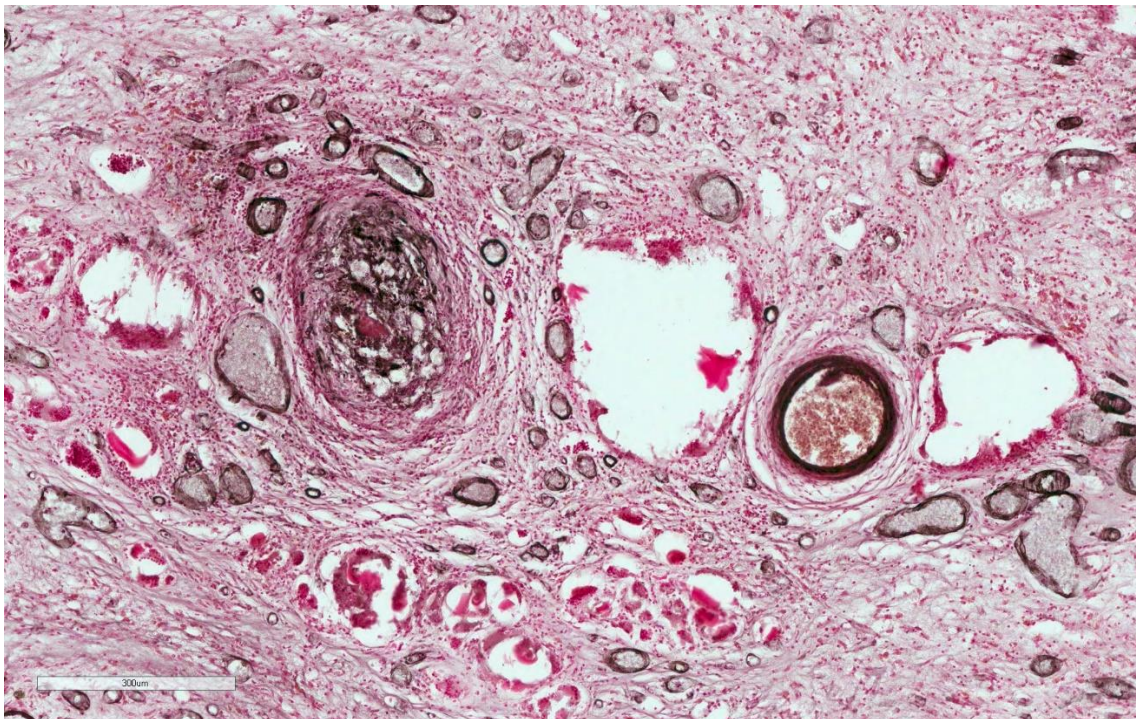

**Figure S5(f)** Cross-section of AVL at 28 days with  $\alpha$ -SMA staining. A greater number of vessels can be observed around the vein (left) than the artery (right). Scale bar = 300 μm
